# Supplementary material for: Highly selective carbon dioxide adsorption on exposed magnesium metals in a cross-linked organo-magnesium complex
Source: Royal Society of Chemistry journal article supplement (doi:10.1039/c4ta01364f), 2014-01-01
Supplement: c4ta01364f1.pdf [file c4ta01364f1.pdf]

## Supporting information

### Highly Selective Carbon Dioxide Adsorption on Exposed Magnesium Metals in A Cross-Linked Organo-Magnesium Complex

Kapil Pareek,<sup>a</sup> Qingfan Zhang,<sup>a,b</sup> Rupesh Rohan<sup>a</sup> and Hansong Cheng<sup>\*a,b</sup>

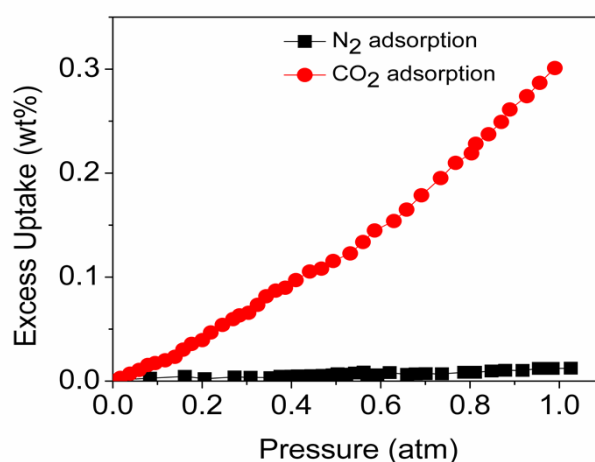

Figure S1: Adsorption isotherms of CO<sub>2</sub> and N<sub>2</sub> on MTF material without metal incorporation (SSA 300 m<sup>2</sup>/g) at 298K and 1 atm pressure.

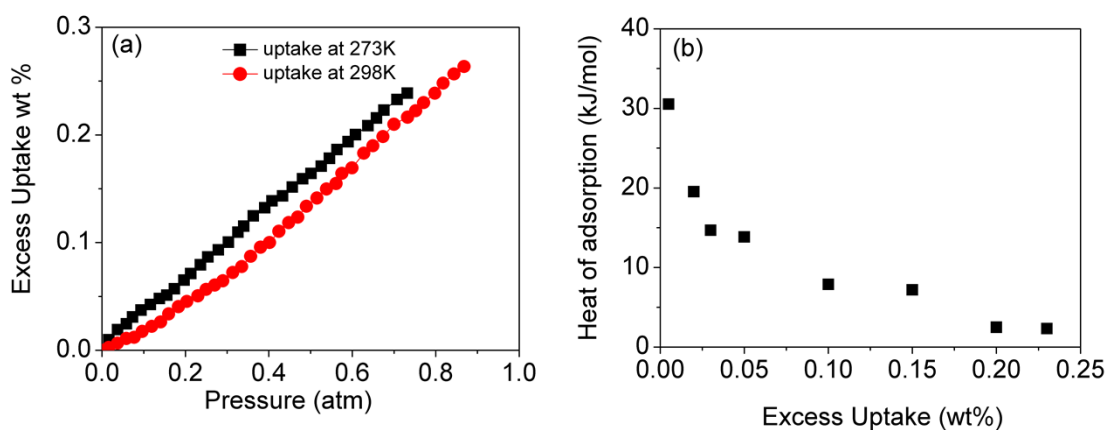

Figure S2: (a) Excess CO<sub>2</sub> uptake on MTF material at 298K and 273K, and (b) heat of CO<sub>2</sub> adsorption on MTF material calculated from Clausius-Clapeyron equation.

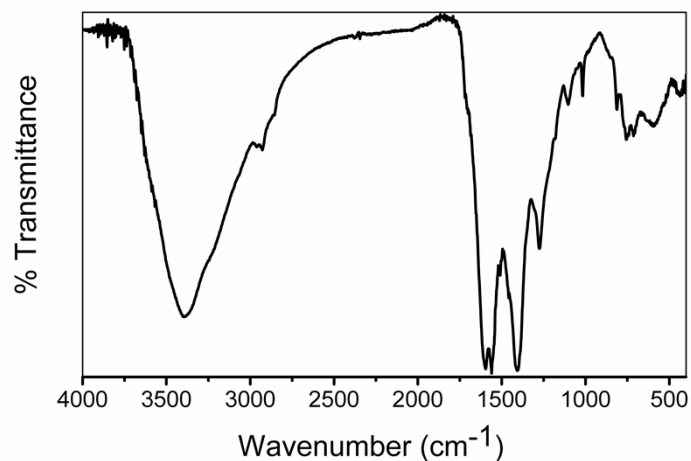

Figure S3: FTIR spectrum of the MTF-Mg complex.

The peaks at  $1550\text{ cm}^{-1}$  and  $1480\text{ cm}^{-1}$  correspond to the triazine rings of the MTF-Mg complex.<sup>4</sup> The compound shows a broad peak at  $3200\text{--}3400\text{ cm}^{-1}$  due to the absorbed moisture during the sample preparation.

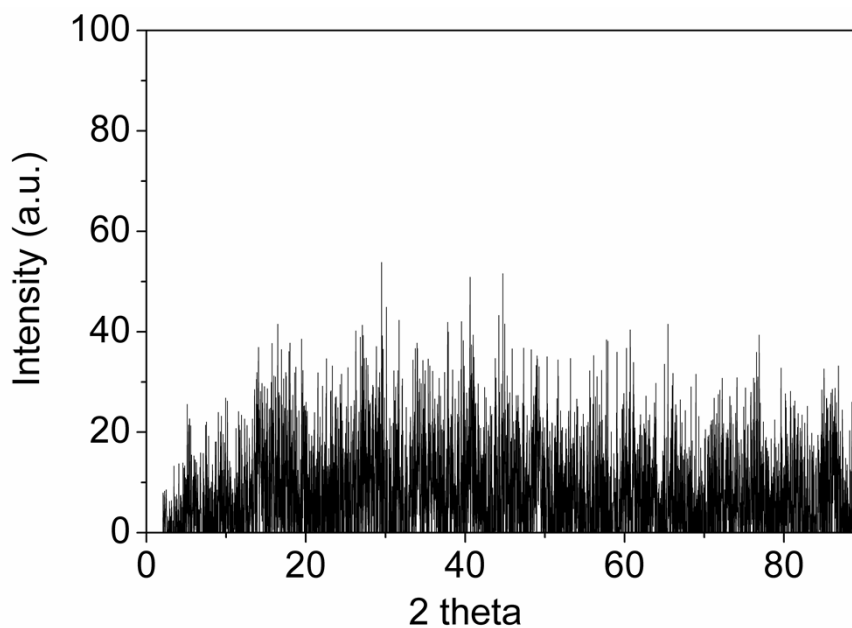

Figure S4: PXRD of MTF-Mg.

The powder X-ray diffraction profile of the MTF-Mg complex indicates that the material is amorphous with absence of a long-range order.

### **Gas adsorption measurement:**

Gas adsorption measurements were performed following the standard US DOE guidelines to minimize the experimental errors. The instrument calibration and the experimental considerations are as follows.<sup>1</sup>

(1) Calibration:

- Calibration of volume, temperature sensors, pressure transducers
- Null calibration (empty sample chamber with zero uptake baseline in isothermal condition) (Fig. S5)
- Calibration of the instrument with known materials (Figs. S6 and S7)

(2) Temperature monitoring and control:

- Temperature of the sample chamber was controlled to an acceptable level by applying water bath (298K) or ice bath (273K).
- The gas reservoir is thermostatted to minimize room temperature fluctuations.

(3) Sample temperature was monitored continuously throughout the measurement.

(4) Approach to the equilibrium:

- For physisorption, the equilibrium is reached relatively fast. The pressure relaxation was measured at each step by taking the data point every minute.

(5) Sample size:

- The sample size was taken carefully to match up with the requirement on the system volume and the pressure measurement.
- Generally, sample size was taken to fill 2/3 volume of the sample chamber (3 cc).

(6) Gas purity: CO<sub>2</sub> (99.8) and N<sub>2</sub> (99.995)

(7) Sample degassing was performed under ultra-high vacuum (UHV).

(8) Sample pretreatment: 150 °C under UHV for 12 h.

(9) Leakage was tested using helium and hydrogen at the maximum measurement pressure.

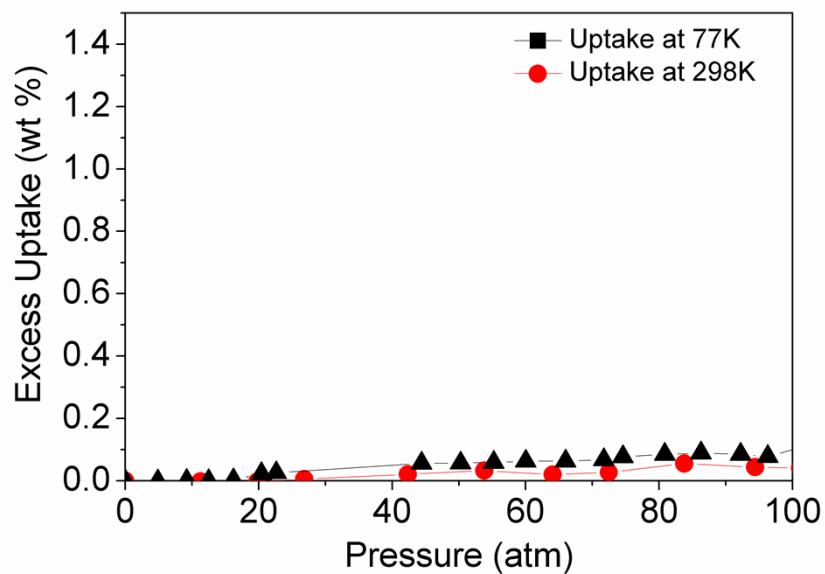

Figure S5: Empty sample holder calibration.

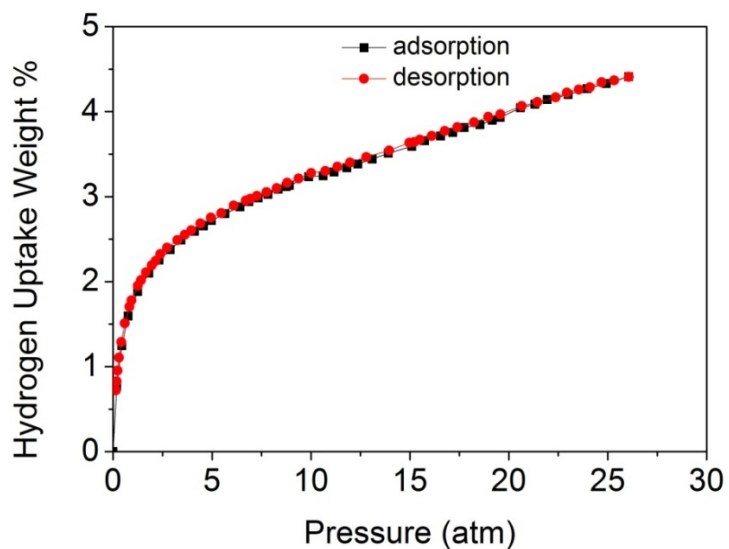

Figure S6: Hydrogen storage capacity of commercially available basolite A100 MOF obtained at 77K using the same instrument under the similar conditions to those used for the gas measurement for the MTF-Mg complex. The results are in good agreement with the reported results in Ref. <sup>2</sup>.

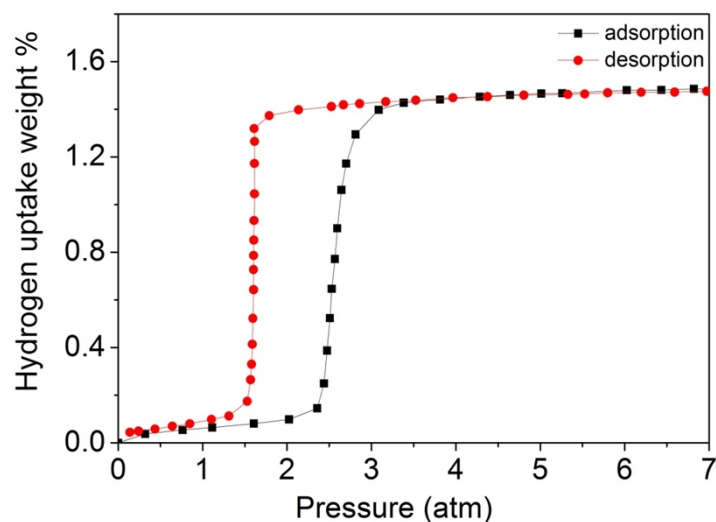

Figure S7: Hydrogen storage capacity of a commercially available LaNi5 alloy obtained at 298K using the same instrument under the similar conditions to those used for the gas measurement for the MTF-Mg complex. The results are in excellent agreement with the data shown in Ref. <sup>3</sup>.

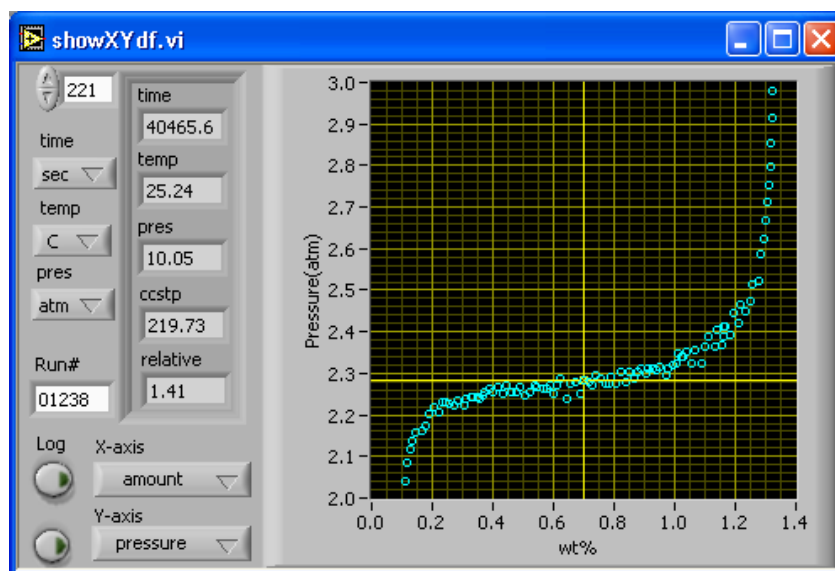

Figure S8: The pressure resolution of the instrument is 0.02 atm (LaNi5 at 298K).

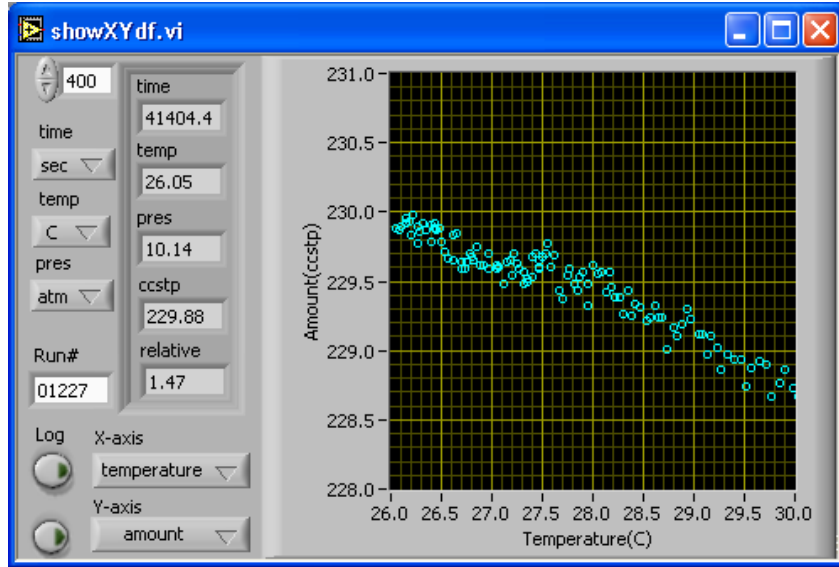

Figure S9: The gas measurement resolution with the GRC instrument 0.2 ccstp.

### Estimation of CO<sub>2</sub> desorption temperature

Consider CO<sub>2</sub> desorption from an adsorbent A, which is MTF-Mg in the present case:

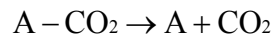

where CO<sub>2</sub> is attached to A. The Gibbs free energy can be calculated as

$$\Delta G = \Delta H - T\Delta S \quad (1)$$

The reaction entropy is largely determined by the enthalpy of CO<sub>2</sub>, assuming the entropies of the surface states of A and A-CO<sub>2</sub> are relatively small, compared to that of CO<sub>2</sub>, and the errors can also partially cancel each other. Equation (1) then becomes

$$\Delta G \approx \Delta H - T\Delta S_{\text{CO}_2} = -RT \ln K = -RT \ln P_{\text{CO}_2} \quad (2)$$

From Eq. (2), we have

$$\Delta H - T\Delta S_{\text{CO}_2} + RT \ln P_{\text{CO}_2} = 0 \quad (3)$$

The entropic data of CO<sub>2</sub> can be obtained from the Reference 5 as a function of temperature. Assume that the CO<sub>2</sub> partial pressure is decreased to 0.005 bar upon desorption. From Eq. (3),

it can be determined that for a heat of adsorption of 45.2 kJ/mol, the desorption temperature is 282K, close to ambient, while for a heat of adsorption of 90kJ/mol, the desorption temperature is 500K.

1. D. P. Broom, *Int. J. Hydrogen Energy*, 2007, **32**, 4871-4888.
2. G. Ferey, M. Latroche, C. Serre, F. Millange, T. Loiseau and A. Percheron-Guegan, *Chem. Commun.*, 2003, **0**, 2976-2977.
3. S. Luo, J. D. Clewley, T. B. Flanagan, R. C. Bowman Jr and L. A. Wade, *J. Alloys Compd.*, 1998, **267**, 171-181.
4. G. Yang, H. Han, C. Du, Z. Luo and Y. Wang, *Polymer*, 2010, **51**, 6193-6202.
5. Yunus A. Çengel, *Introduction to Thermodynamics and Heat Transfer*, McGraw-Hill Higher Education, 2008, ISBN 0071287736, 9780071287739
